# Supplementary material for: In Silico Investigations of Multi-Drug Adaptive Therapy Protocols
Source: MDPI journal article supplement (doi:10.3390/cancers14112699), 2022-05-30
Supplement: s1 [file s1]

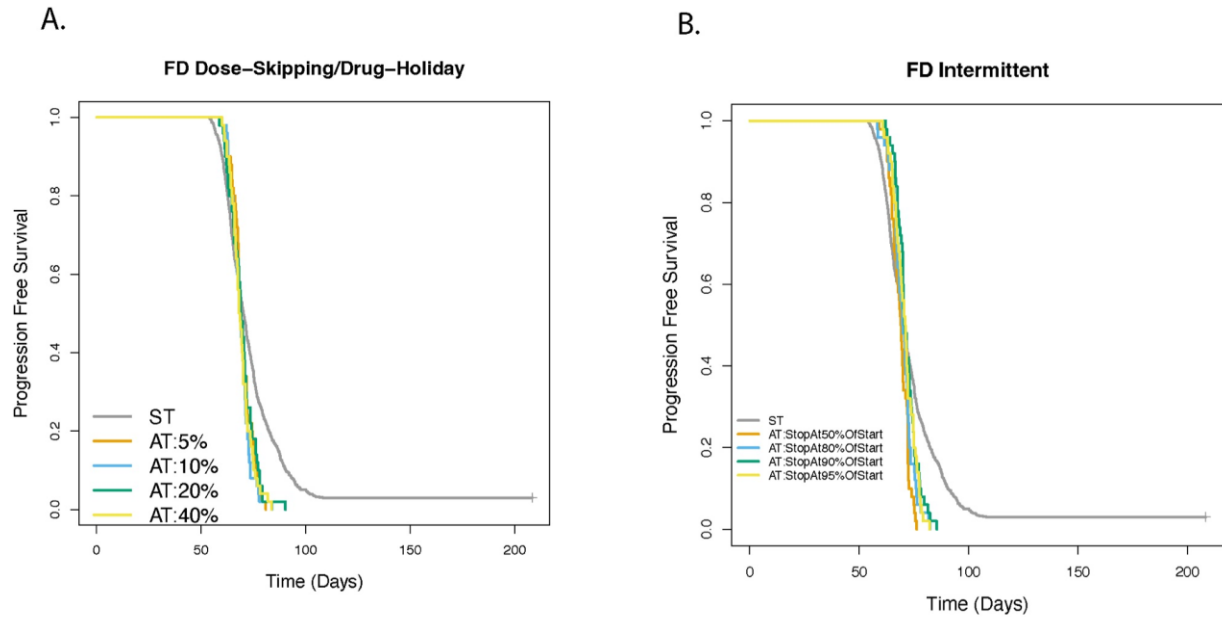

**Figure S1. Role of Delta Tumor parameter in determining outcome of fixed-dose (FD) adaptive therapy protocols.** For FD Dose-Skipping/Drug-Holiday, delta tumor is percentage change in tumor burden relative to the last measurement, such that a fixed dosage of the drugs is administered if the tumor burden exceeds the threshold, and treatment is skipped otherwise, default value being 10%. For FD Intermittent, Delta Tumor is the absolute value at which treatment is stopped relative to the baseline for treatment initiation, default being stopping treatment when tumor shrinks to 50% of the initial baseline for treatment initiation. The Fixed Dose (FD) protocols. **A.** FD Dose-Skipping/Drug-Holiday, **B.** FD intermittent are defined in the text.

## 2-Drug Adaptive Therapy Protocols

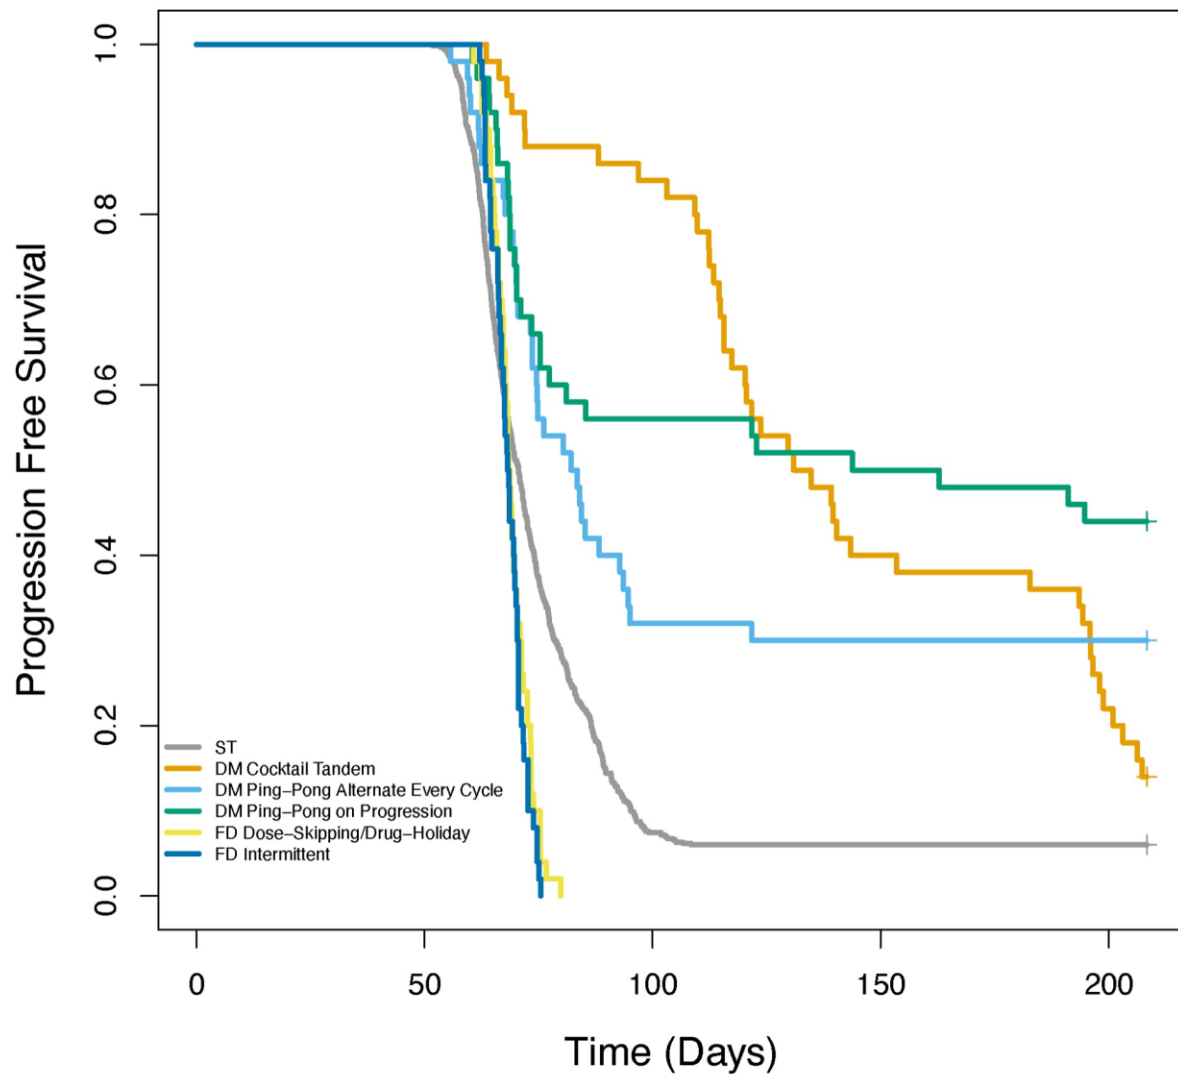

**Figure S2. Survival curves when cells can undergo forward mutation to resistance phenotypes but no reverse mutations.** Dose modulation (DM) adaptive therapy protocols still work better than fixed dose (FD) adaptive therapy protocols.

## 2-Drug Adaptive Therapy Protocols

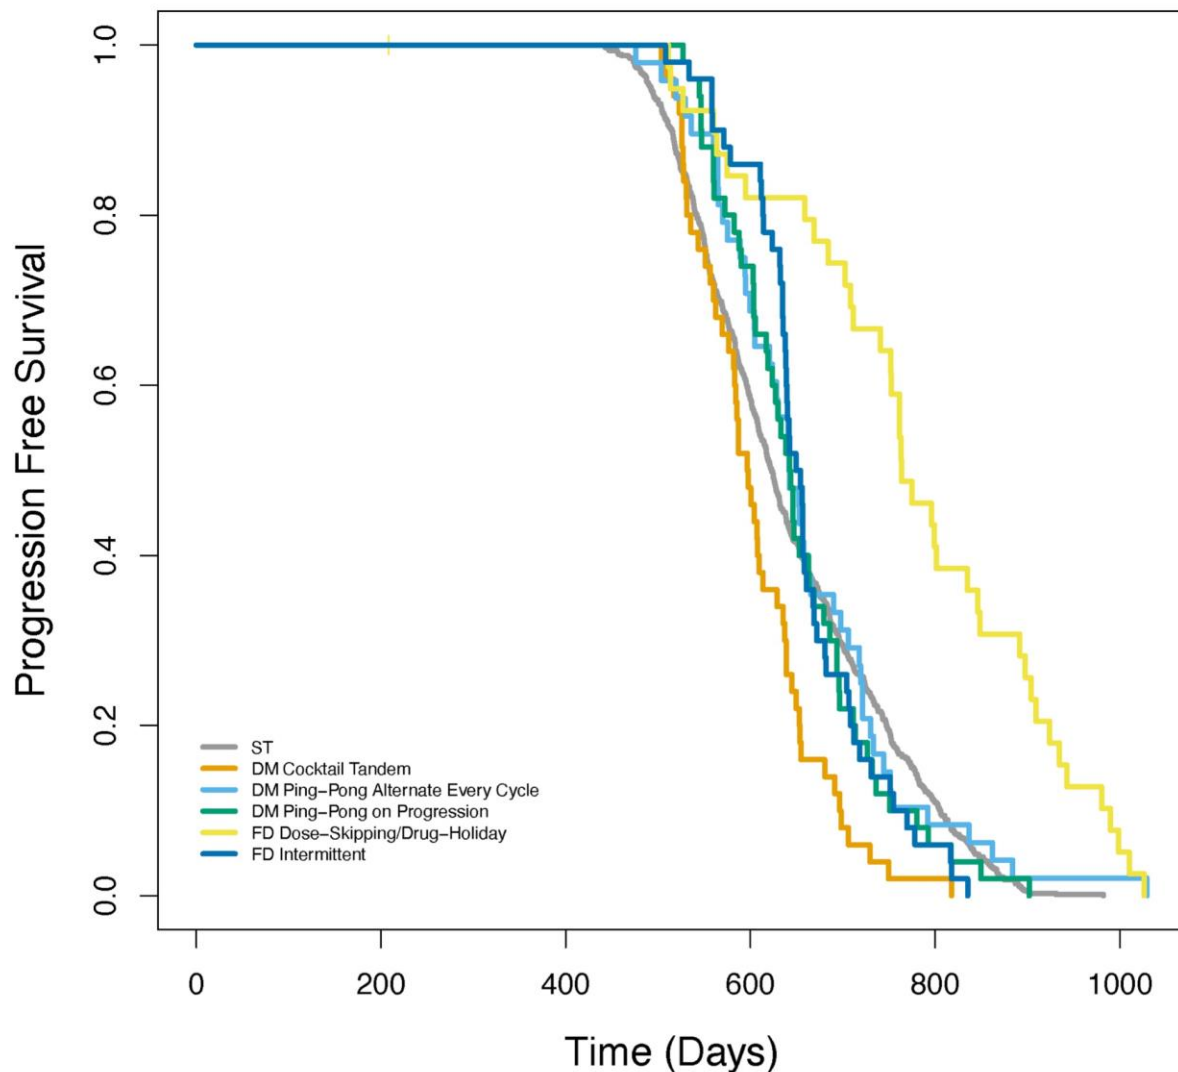

**Figure S3.** Survival curves when the doubling time of each cell type is increased by one order of magnitude relative to the default values, representing slow tumor doubling times. Note all therapies prevent progression for much longer than the 200 days we tested in previous experiments. Dose modulation (DM) adaptive therapy protocols and fixed dose (FD) adaptive therapy protocols are mostly equivalent to standard treatment (ST), though FD Dose-Skipping/Drug-Holiday is better, and DM Cocktail Tandem is worse.

**Table S1:** Hazard ratios along with the 95% confidence intervals (c.i.), *p*-values, and test for proportionality of hazards *p*-values for various dose-modulation and fixed-dose adaptive therapy protocols relative to standard treatment (ST).

| Protocol                                 | Hazard Ratio (95% c.i.)<br>relative to standard<br>treatment | <i>p</i> value | Test for<br>proportionality<br>of hazards <i>p</i><br>value |
|------------------------------------------|--------------------------------------------------------------|----------------|-------------------------------------------------------------|
| DM Cocktail                              | 0.25 (0.18-0.35)                                             | <0.001         | 0.0016                                                      |
| DM Ping-Pong<br>Alternate Every<br>Cycle | 0.26 (0.18-0.38)                                             | <0.001         | 0.66                                                        |
| DM Ping-Pong on<br>Progression           | 0.13 (0.08-0.22)                                             | <0.001         | 0.045                                                       |
| FD Intermittent                          | 1.67 (1.25-2.24)                                             | <0.001         | 1.6e-10                                                     |
| FD Dose-<br>Skipping/Drug<br>Holiday     | 1.65 (1.23-2.21)                                             | <0.001         | 1.2e-7                                                      |

**Table S2.** Hazard ratios along with the 95% confidence intervals (c.i.), *p*-values, and test for proportionality of hazards *p*-values for Fitness Cost Parameter. Abbreviations: n.s. is not significant, ST is standard treatment.

| Comparison                                                                                           | Hazard Ratio (95% c.i.) | <i>p</i> value | Test for proportionality of hazards <i>p</i> value |
|------------------------------------------------------------------------------------------------------|-------------------------|----------------|----------------------------------------------------|
| ST (5X cost) relative to ST (3X cost)                                                                | 1.47 (1.32-1.64)        | <0.001         | <2e-16                                             |
| DM Cocktail (3X cost) relative to ST (3X cost)                                                       |                         | n.s. (0.297)   |                                                    |
| DM Cocktail (5X cost) relative to ST (5X cost)                                                       | 0.25 (0.18-0.35)        | <0.001         | 0.0016                                             |
| DM Cocktail (5X cost) relative to DM Cocktail (3X cost)                                              | 0.09 (0.04-0.18)        | <0.001         | 3.5e-8                                             |
| DM Ping-Pong Alternate Every Cycle (3X cost) relative to ST (3X cost)                                |                         | n.s. (0.706)   |                                                    |
| DM Ping-Pong Alternate Every Cycle (5X cost) relative to ST (5X cost)                                | 0.26 (0.18-0.38)        | <0.001         | 0.66                                               |
| DM Ping-Pong Alternate Every Cycle (5X cost) relative to DM Ping-Pong Alternate Every Dose (3X cost) | 0.35 (0.21-0.56)        | <0.001         | 3e-4                                               |
| DM Ping-Pong on Progression (3X cost) relative to ST (3X cost)                                       | 1.34 (1.00-1.79)        | 0.0482         | 0.0052                                             |
| DM Ping-Pong on Progression (5X cost) relative to ST (5X cost)                                       | 0.13 (0.08-0.22)        | <0.001         | 0.045                                              |
| DM Ping-Pong on Progression (5X cost) relative to DM Ping-Pong on Progression (3X cost)              | 0.17 (0.09-0.31)        | <0.001         | 1.4e-8                                             |
| FD Dose-Skipping/Drug Holiday (3X cost) relative to ST (3X cost)                                     | 1.47 (1.10-1.97)        | 0.00851        | 0.092                                              |
| FD Dose-Skipping/Drug Holiday                                                                        | 1.65 (1.23-2.21)        | <0.001         | 1.2e-7                                             |

|                                                                                       |                     |              |         |
|---------------------------------------------------------------------------------------|---------------------|--------------|---------|
| (5X cost) relative to ST (5X cost)                                                    |                     |              |         |
| FD Dose-Skipping/Drug Holiday (5X cost) relative to FD Dose-Skipping (AT-2) (3X cost) | 3.12 (2.03-4.80)    | <0.001       | 0.23    |
| FD Intermittent (3X cost) relative to ST (3X cost)                                    |                     | n.s. (0.344) |         |
| FD Intermittent (5X cost) relative to ST (5X cost)                                    | 1.67 (1.25-2.24)    | <0.001       | 1.6e-10 |
| FD Intermittent (5X cost) relative to FD Intermittent (3X cost)                       | 28.88 (12.73-65.54) | <0.001       | 0.17    |

**Table S3.** Hazard ratios along with the 95% confidence intervals (c.i.), *p*-values, and test for proportionality of hazards *p*-values for Turnover Parameter. Abbreviations: n.s. is not significant, LT is low turnover, HT is high turnover, ST is standard treatment.

| Comparison                                                                                 | Hazard Ratio (95% c.i.) | <i>p</i> value | Test for proportionality of hazards <i>p</i> value |
|--------------------------------------------------------------------------------------------|-------------------------|----------------|----------------------------------------------------|
| ST (HT) relative to ST (LT)                                                                | 0.68 (0.61-0.76)        | <0.001         | 0.1                                                |
| DM Cocktail (LT) relative to ST (LT)                                                       | 0.25 (0.18-0.35)        | <0.001         | 0.0018                                             |
| DM Cocktail (HT) relative to ST (HT)                                                       | 0.20 (0.13-0.30)        | <0.001         | 3.7e-6                                             |
| DM Cocktail (HT) relative to DM Cocktail (LT)                                              | 0.29 (0.17-0.49)        | <0.001         | 0.62                                               |
| DM Ping-Pong Alternate Every Cycle (LT) relative to ST (LT)                                | 0.27 (0.19-0.40)        | <0.001         | 0.31                                               |
| DM Ping-Pong Alternate Every Cycle (HT) relative to ST (HT)                                | 0.35 (0.24-0.51)        | <0.001         | 0.032                                              |
| DM Ping-Pong Alternate Every Cycle (HT) relative to DM Ping-Pong Alternate Every Dose (LT) |                         | n.s. (0.424)   |                                                    |
| DM Ping-Pong on Progression (LT) relative to ST (LT)                                       | 0.14 (0.09-0.22)        | <0.001         | 0.93                                               |
| DM Ping-Pong on Progression (HT) relative to ST (HT)                                       | 0.22 (0.14-0.34)        | <0.001         | 0.072                                              |
| DM Ping-Pong on Progression (HT) relative to DM Ping-Pong on Progression (LT)              |                         | n.s. (0.834)   |                                                    |
| FD Dose-Skipping/Drug Holiday (LT) relative to ST (LT)                                     | 1.60 (1.19-2.14)        | 0.00175        | 2.1e-10                                            |
| FD Dose-Skipping/Drug Holiday (HT) relative to ST (HT)                                     | 1.90 (1.42-2.55)        | <0.001         | 8.7e-7                                             |
| FD Dose-Skipping/Drug Holiday (HT) relative to FD Dose-Skipping (AT-2) (LT)                | 0.61 (0.39-0.93)        | 0.0234         | 0.0019                                             |

|                                                       |                  |         |         |
|-------------------------------------------------------|------------------|---------|---------|
| FD Intermittent (LT) relative to ST (LT)              | 1.58 (1.18-2.11) | 0.00213 | 4.5e-7  |
| FD Intermittent (HT) relative to ST (HT)              | 1.44 (1.07-1.92) | 0.0151  | 1.5e-10 |
| FD Intermittent (HT) relative to FD Intermittent (LT) | 0.39 (0.26-0.60) | <0.001  | 0.25    |



**Table S4.** Hazard ratios along with the 95% confidence intervals (c.i.), *p*-values, and test for proportionality of hazards *p*-values for Replacement Parameter. Abbreviations: n.s. is not significant, Rep is replacement, ST is standard treatment.

| Comparison                                                                                 | Hazard Ratio (95% c.i.) | <i>p</i> value | Test for proportionality of hazards <i>p</i> value |
|--------------------------------------------------------------------------------------------|-------------------------|----------------|----------------------------------------------------|
| ST (50% Rep) relative to ST (0% Rep)                                                       | 0.36 (0.32-0.40)        | <0.001         | 0.0016                                             |
| ST (100% Rep) relative to ST (50% Rep)                                                     | 0.83 (0.74-0.92)        | <0.001         | 0.11                                               |
| DM Cocktail (0% Rep) relative to ST (0% Rep)                                               | 0.32 (0.23-0.43)        | <0.001         | 0.011                                              |
| DM Cocktail (50% Rep) relative to ST (50% Rep)                                             | 0.25 (0.18-0.35)        | <0.001         | 0.0016                                             |
| DM Cocktail (100% Rep) relative to ST (100% Rep)                                           | 0.03 (0.01-0.08)        | <0.001         | 0.097                                              |
| DM Cocktail (50% Rep) relative to DM Cocktail (0% Rep)                                     | 0.08 (0.04-0.16)        | <0.001         | 0.00033                                            |
| DM Cocktail (100% Rep) relative to DM Cocktail (50% Rep)                                   | 0.05 (0.02-0.15)        | <0.001         | 0.87                                               |
| DM Ping-Pong Alternate Every Cycle (0% Rep) relative to ST (0% Rep)                        | 0.28 (0.20-0.40)        | <0.001         | 0.79                                               |
| DM Ping-Pong Alternate Every Cycle (50% Rep) relative to ST (50% Rep)                      | 0.26 (0.18-0.38)        | <0.001         | 0.66                                               |
| DM Ping-Pong Alternate Every Cycle (100% Rep) relative to ST (100% Rep)                    | 0.23 (0.16-0.35)        | <0.001         | 0.025                                              |
| DM Ping-Pong Alternate Every Cycle (50% Rep) relative to DM Ping-Pong Alternate (0% Rep)   | 0.45 (0.27-0.73)        | 0.00128        | 0.028                                              |
| DM Ping-Pong Alternate Every Cycle (100% Rep) relative to DM Ping-Pong Alternate (50% Rep) |                         | n.s. (0.275)   |                                                    |

|                                                                                        |                  |              |         |
|----------------------------------------------------------------------------------------|------------------|--------------|---------|
| DM Ping-Pong on Progression (0% Rep) relative to ST (0% Rep)                           | 0.24 (0.17-0.34) | <0.001       | 0.026   |
| DM Ping-Pong on Progression (50% Rep) relative to ST (50% Rep)                         | 0.13 (0.08-0.22) | <0.001       | 0.026   |
| DM Ping-Pong on Progression (100% Rep) relative to ST (100% Rep)                       | 0.07 (0.03-0.13) | <0.001       | 0.69    |
| DM Ping-Pong on Progression (50% Rep) relative to DM Ping-Pong Progression (0% Rep)    | 0.23 (0.13-0.41) | <0.001       | 0.85    |
| DM Ping-Pong on Progression (100% Rep) relative to DM Ping-Pong Progression (50% Rep)  | 0.40 (0.17-0.92) | 0.0305       | 0.044   |
| FD Dose-Skipping/Drug Holiday (0% Rep) relative to ST (0% Rep)                         |                  | n.s. (0.191) |         |
| FD Dose-Skipping/Drug Holiday (50% Rep) relative to ST (50% Rep)                       | 1.65 (1.23-2.21) | <0.001       | 1.2e-7  |
| FD Dose-Skipping/Drug Holiday (100% Rep) relative to ST (100% Rep)                     |                  | n.s. (0.938) |         |
| FD Dose-Skipping/Drug Holiday (50% Rep) relative to FD Dose-Skipping (AT-2) (0% Rep)   | 0.31 (0.21-0.48) | <0.001       | 0.002   |
| FD Dose-Skipping/Drug Holiday (100% Rep) relative to FD Dose-Skipping (AT-2) (50% Rep) | 0.26 (0.17-0.41) | <0.001       | 0.47    |
| FD Intermittent (0% Rep) relative to ST (0% Rep)                                       | 1.49 (1.12-1.99) | <0.00696     | 0.00043 |
| FD Intermittent (50% Rep) relative to ST (50% Rep)                                     | 1.67 (1.25-2.24) | <0.001       | 1.6e-10 |
| FD Intermittent (100% Rep) relative to ST (100% Rep)                                   |                  | n.s. (0.294) |         |

|                                                                     |                  |        |       |
|---------------------------------------------------------------------|------------------|--------|-------|
| FD Intermittent (50% Rep)<br>relative to FD Intermittent (0% Rep)   | 0.15 (0.09-0.25) | <0.001 | 0.089 |
| FD Intermittent (100% Rep)<br>relative to FD Intermittent (50% Rep) | 0.25 (0.16-0.40) | <0.001 | 0.96  |

**Table S5.** Hazard ratios along with the 95% confidence intervals (c.i.), *p*-values, and test for proportionality of hazards *p*-values for Delta Tumor Parameter. Abbreviations: n.s. is not significant, ST is standard treatment.

| Comparison                                                                    | Hazard Ratio<br>(95% c.i.) | <i>p</i> value | Test for<br>proportionality of<br>hazards <i>p</i><br>value |
|-------------------------------------------------------------------------------|----------------------------|----------------|-------------------------------------------------------------|
| DM Cocktail (Delta Tumor 5%)<br>relative to ST                                |                            | n.s. (0.982)   |                                                             |
| DM Cocktail (Delta Tumor 10%)<br>relative to ST                               | 0.25 (0.18-0.35)           | <0.001         | 0.0016                                                      |
| DM Cocktail (Delta Tumor 20%)<br>relative to ST                               | 0.57 (0.43-0.76)           | <0.001         | 3.2e-7                                                      |
| DM Cocktail (Delta Tumor 40 %)<br>relative to ST                              |                            | n.s. (0.166)   |                                                             |
| DM Cocktail (Delta Tumor 10%)<br>relative to DM Cocktail (Delta<br>Tumor 5%)  |                            | n.s. (0.996)   |                                                             |
| DM Cocktail (Delta Tumor 20%)<br>relative to DM Cocktail (Delta<br>Tumor 10%) | 11.68 (5.61-<br>24.32)     | <0.001         | 7e-9                                                        |
| DM Cocktail (Delta Tumor 40%)<br>relative to DM Cocktail (Delta<br>Tumor 20%) | 6.73 (3.74-12.11)          | <0.001         | 4.3e-5                                                      |
| DM Ping-Pong Alternate Every<br>Cycle (Delta Tumor 5%) relative to<br>ST      | 0.31 (0.22-0.44)           | <0.001         | 0.5                                                         |
| DM Ping-Pong Alternate Every<br>Cycle (Delta Tumor 10%) relative<br>to ST     | 0.26 (0.18-0.38)           | <0.001         | 0.66                                                        |
| DM Ping-Pong Alternate Every<br>Cycle (Delta Tumor 20%) relative<br>to ST     | 0.50 (0.37-0.68)           | <0.001         | 0.053                                                       |
| DM Ping-Pong Alternate Every<br>Cycle (Delta Tumor 40 %) relative<br>to ST    | 0.67 (0.50-0.90)           | 0.00795        | 4.2e-7                                                      |

|                                                                                                                       |                  |               |        |
|-----------------------------------------------------------------------------------------------------------------------|------------------|---------------|--------|
| DM Ping-Pong Alternate Every Cycle (Delta Tumor 10%) relative to DM Ping-Pong Alternate Every Cycle (Delta Tumor 5%)  |                  | n.s. (0.397)  |        |
| DM Ping-Pong Alternate Every Cycle (Delta Tumor 20%) relative to DM Ping-Pong Alternate Every Cycle (Delta Tumor 10%) | 1.97 (1.22-3.18) | 0.00571       | 0.097  |
| DM Ping-Pong Alternate Every Cycle (Delta Tumor 40%) relative to DM Ping-Pong Alternate Every Cycle (Delta Tumor 20%) |                  | n.s. (0.0517) |        |
| DM Ping-Pong on Progression (Delta Tumor 5%) relative to ST                                                           | 0.09 (0.05-0.16) | <0.001        | 0.0018 |
| DM Ping-Pong on Progression (Delta Tumor 10%) relative to ST                                                          | 0.13 (0.08-0.22) | <0.001        | 0.045  |
| DM Ping-Pong on Progression (Delta Tumor 20%) relative to ST                                                          | 0.40 (0.29-0.55) | <0.001        | 0.82   |
| DM Ping-Pong on Progression (Delta Tumor 40 %) relative to ST                                                         |                  | n.s. (0.545)  |        |
| DM Ping-Pong on Progression (Delta Tumor 10%) relative to DM Ping-Pong on Progression (Delta Tumor 5%)                |                  | n.s. (0.356)  |        |
| DM Ping-Pong on Progression (Delta Tumor 20%) relative to DM Ping-Pong on Progression (Delta Tumor 10%)               | 3.20 (1.80-5.68) | <0.001        | 0.018  |
| DM Ping-Pong on Progression (Delta Tumor 40%) relative to DM Ping-Pong on Progression (Delta Tumor 20%)               | 2.71 (1.71-4.28) | <0.001        | 0.022  |
| FD Dose-Skipping/Drug Holiday (Delta Tumor 5%) relative to ST                                                         | 1.50 (1.12-2.01) | 0.00631       | 4.2e-8 |
| FD Dose-Skipping/Drug Holiday (Delta Tumor 10%) relative to ST                                                        | 1.65 (1.23-2.21) | <0.001        | 1.2e-7 |

|                                                                                                       |                  |               |         |
|-------------------------------------------------------------------------------------------------------|------------------|---------------|---------|
| FD Dose-Skipping/Drug Holiday (Delta Tumor 20%) relative to ST                                        | 1.45 (1.11-1.98) | 0.00832       | 0.00015 |
| FD Dose-Skipping/Drug Holiday (Delta Tumor 40 %) relative to ST                                       | 1.59 (1.18-2.12) | 0.00196       | 1.6e-6  |
| FD Dose-Skipping/Drug Holiday (Delta Tumor 10%) relative to FD Dose-Skipping (AT-2) (Delta Tumor 5%)  |                  | n.s. (0.484)  |         |
| FD Dose-Skipping/Drug Holiday (Delta Tumor 20%) relative to FD Dose-Skipping (AT-2) (Delta Tumor 10%) |                  | n.s. (0.254)  |         |
| FD Dose-Skipping/Drug Holiday (Delta Tumor 40%) relative to FD Dose-Skipping (AT-2) (Delta Tumor 20%) |                  | n.s. (0.51)   |         |
| FD Intermittent (Stop At 50% of Start) relative to ST                                                 | 1.67 (1.25-2.24) | <0.001        | 1.6e-10 |
| FD Intermittent (Stop At 80% of Start) relative to ST                                                 | 1.45 (1.08-1.94) | 0.0127        | 1.6e-8  |
| FD Intermittent (Stop At 90% of Start) relative to ST                                                 |                  | n.s. (0.154)  |         |
| FD Intermittent (Stop At 95% of Start) relative to ST                                                 |                  | n.s. (0.0558) |         |
| FD Intermittent (Stop At 80% of Start) relative to FD Intermittent (Stop At 50% of Start)             |                  | n.s. (0.0767) |         |
| FD Intermittent (Stop At 90% of Start) relative to FD Intermittent (Stop At 80% of Start)             |                  | n.s. (0.13)   |         |
| FD Intermittent (Stop At 95% of Start) relative to FD Intermittent (Stop At 90% of Start)             |                  | n.s. (0.432)  |         |

**Table S6.** Hazard ratios along with the 95% confidence intervals (c.i.), *p*-values, and test for proportionality of hazards *p*-values for Delta Dose Parameter. Abbreviations: n.s. is not significant, ST is standard treatment.

| Comparison                                                                                                                    | Hazard Ratio<br>(95% c.i.) | <i>p</i> value | Test for<br>proportionality of<br>hazards <i>p</i><br>value |
|-------------------------------------------------------------------------------------------------------------------------------|----------------------------|----------------|-------------------------------------------------------------|
| DM Cocktail (Delta Dose 25%)<br>relative to ST                                                                                |                            | n.s. (0.355)   |                                                             |
| DM Cocktail (Delta Dose 50%)<br>relative to ST                                                                                | 0.34 (0.24-0.47)           | <0.001         | 1.2e-5                                                      |
| DM Cocktail (Delta Dose 75%)<br>relative to ST                                                                                | 0.40 (0.29-0.54)           | <0.001         | 3.3e-9                                                      |
| DM Cocktail (Delta Dose 50%)<br>relative to DM Cocktail (Delta Dose<br>25%)                                                   | 0.09 (0.04-0.18)           | <0.001         | 1.2e-6                                                      |
| DM Cocktail (Delta Dose 75%)<br>relative to DM Cocktail (Delta<br>Tumor 50%)                                                  | 1.74 (1.13-2.67)           | 0.0112         | 0.68                                                        |
| DM Ping-Pong Alternate Every<br>Cycle (Delta Dose 25%) relative to<br>ST                                                      | 0.37 (0.26-0.53)           | <0.001         | 0.79                                                        |
| DM Ping-Pong Alternate Every<br>Cycle (Delta Dose 50%) relative to<br>ST                                                      | 0.46 (0.33-0.64)           | <0.001         | 0.0018                                                      |
| DM Ping-Pong Alternate Every<br>Cycle (Delta Dose 75%) relative to<br>ST                                                      | 0.39 (0.27-0.55)           | <0.001         | 0.069                                                       |
| DM Ping-Pong Alternate Every<br>Cycle (Delta Dose 50%) relative to<br>DM Ping-Pong Alternate Every<br>Cycle (Delta Dose 25%)  |                            | n.s. (0.306)   |                                                             |
| DM Ping-Pong Alternate Every<br>Cycle (Delta Dose 75%) relative to<br>DM Ping-Pong Alternate Every<br>Cycle (Delta Tumor 50%) |                            | n.s. (0.451)   |                                                             |

|                                                                                                                 |                  |               |         |
|-----------------------------------------------------------------------------------------------------------------|------------------|---------------|---------|
| DM Ping-Pong on Progression<br>(Delta Dose 25%) relative to ST                                                  | 0.13 (0.08-0.23) | <0.001        | 0.021   |
| DM Ping-Pong on Progression<br>(Delta Dose 50%) relative to ST                                                  | 0.15 (0.09-0.25) | <0.001        | 0.00064 |
| DM Ping-Pong on Progression<br>(Delta Dose 75%) relative to ST                                                  | 0.29 (0.20-0.44) | <0.001        | 0.085   |
| DM Ping-Pong on Progression<br>(Delta Dose 50%) relative to DM<br>Ping-Pong on Progression (Delta<br>Dose 25%)  |                  | n.s. (0.754)  |         |
| DM Ping-Pong on Progression<br>(Delta Dose 75%) relative to DM<br>Ping-Pong on Progression (Delta<br>Tumor 50%) |                  | n.s. (0.0795) |         |



**Table S7.** Hazard ratios along with the 95% confidence intervals (c.i.), *p*-values, and test for proportionality of hazards *p*-values for Treatment Vacation Parameter. Abbreviations: n.s. is not significant, ST is standard treatment.

| Comparison                                                                                                                                          | Hazard Ratio<br>(95% c.i.) | <i>p</i> value | Test for<br>proportionality of<br>hazards <i>p</i><br>value |
|-----------------------------------------------------------------------------------------------------------------------------------------------------|----------------------------|----------------|-------------------------------------------------------------|
| DM Cocktail (Treat Vacation at 10% of start) relative to ST                                                                                         | 1.95 (1.45-2.61)           | <0.001         | 0.00014                                                     |
| DM Cocktail (Treat Vacation at 50% of start) relative to ST                                                                                         | 0.25 (0.18-0.35)           | <0.001         | 0.0016                                                      |
| DM Cocktail (Treat Vacation at 80% of start) relative to ST                                                                                         | 0.19 (0.13-0.26)           | <0.001         | 2.1e-8                                                      |
| DM Cocktail (Treat Vacation at 50% of start) relative to DM Cocktail (Treat Vacation at 10% of start)                                               | 0.05 (0.02-0.11)           | <0.001         | 0.019                                                       |
| DM Cocktail (Treat Vacation at 80% of start) relative to DM Cocktail (Treat Vacation at 50% of start)                                               |                            | n.s. (0.0966)  |                                                             |
| DM Ping-Pong Alternate Every Cycle (Treat Vacation at 10% of start) relative to ST                                                                  |                            | n.s.(0.277)    |                                                             |
| DM Ping-Pong Alternate Every Cycle (Treat Vacation at 50% of start) relative to ST                                                                  | 0.26 (0.18-0.38)           | <0.001         | 0.66                                                        |
| DM Ping-Pong Alternate Every Cycle (Treat Vacation at 80% of start) relative to ST                                                                  | 0.19 (0.13-0.28)           | <0.001         | 0.0031                                                      |
| DM Ping-Pong Alternate Every Cycle (Treat Vacation at 50% of start) relative to DM Ping-Pong Alternate Every Cycle (Treat Vacation at 10% of start) | 0.25 (0.15-0.40)           | <0.001         | 0.46                                                        |
| DM Ping-Pong Alternate Every Cycle (Treat Vacation at 80% of start) relative to DM Ping-Pong Alternate Every Cycle (Treat Vacation at 50% of start) |                            | n.s. (0.31)    |                                                             |

|                                                                                                                                       |                  |             |       |
|---------------------------------------------------------------------------------------------------------------------------------------|------------------|-------------|-------|
| start) relative to DM Ping-Pong Alternate Every Cycle (Treat Vacation at 50% of start)                                                |                  |             |       |
| DM Ping-Pong on Progression (Treat Vacation at 10% of start) relative to ST                                                           | 1.38 (1.03-1.84) | 0.0311      | 0.096 |
| DM Ping-Pong on Progression (Treat Vacation at 50% of start) relative to ST                                                           | 0.13 (0.08-0.22) | <0.001      | 0.045 |
| DM Ping-Pong on Progression (Treat Vacation at 80% of start) relative to ST                                                           | 0.16 (0.11-0.25) | <0.001      | 0.19  |
| DM Ping-Pong on Progression (Treat Vacation at 50% of start) relative to DM Ping-Pong on Progression (Treat Vacation at 10% of start) | 0.13 (0.07-0.24) | <0.001      | 0.73  |
| DM Ping-Pong on Progression (Treat Vacation at 80% of start) relative to DM Ping-Pong on Progression (Treat Vacation at 50% of start) |                  | n.s. (0.76) |       |

**Table S8:** Hazard ratios along with the 95% confidence intervals (c.i.),  $p$ -values, and test for proportionality of hazards  $p$ -values for various dose-modulation and fixed-dose adaptive therapy protocols relative to standard treatment (ST) under conditions when cells can undergo forward mutations only but no reverse mutations.

| Protocol                                 | Hazard Ratio (95% c.i.)<br>relative to standard<br>treatment | $p$ value | Test for<br>proportionality<br>of hazards $p$<br>value |
|------------------------------------------|--------------------------------------------------------------|-----------|--------------------------------------------------------|
| DM Cocktail                              | 0.33 (0.24-0.45)                                             | <0.001    | 1.3e-7                                                 |
| DM Ping-Pong<br>Alternate Every<br>Cycle | 0.46 (0.33-0.64)                                             | <0.001    | 0.59                                                   |
| DM Ping-Pong on<br>Progression           | 0.30 (0.20-0.44)                                             | <0.001    | 0.38                                                   |
| FD Intermittent                          | 1.79 (1.33-2.40)                                             | <0.001    | 1.1e-12                                                |
| FD Dose-<br>Skipping/Drug<br>Holiday     | 1.67 (1.24-2.24)                                             | <0.001    | 9.1e-12                                                |

**Table S9:** Hazard ratios along with the 95% confidence intervals (c.i.),  $p$ -values, and test for proportionality of hazards  $p$ -values for various dose-modulation and fixed-dose adaptive therapy protocols relative to standard treatment (ST) under conditions when the doubling time of each cell type is increased by one order of magnitude relative to the default values.

| Protocol                                 | Hazard Ratio (95% c.i.)<br>relative to standard<br>treatment | $p$ value    | Test for<br>proportionality<br>of hazards $p$<br>value |
|------------------------------------------|--------------------------------------------------------------|--------------|--------------------------------------------------------|
| DM Cocktail                              | 1.62 (1.21-2.17)                                             | 0.0011       | 0.016                                                  |
| DM Ping-Pong<br>Alternate Every<br>Cycle | 0.88 (0.66-1.19)                                             | n.s. (0.42)  | 0.33                                                   |
| DM Ping-Pong on<br>Progression           | 1.00 (0.75-1.33)                                             | n.s. (0.997) | 0.018                                                  |
| FD Intermittent                          | 1.00 (0.75-1.34)                                             | n.s. (0.997) | 1.7e-6                                                 |
| FD Dose-<br>Skipping/Drug<br>Holiday     | 0.31 (0.21-0.44)                                             | <0.001       | 0.95                                                   |
